# Supplementary material for: Flexible decapyrrylcorannulene hosts
Source: PubMed Central journal article supplement (PMC6353959; doi:10.1038/s41467-019-08343-6), 2019-01-30
Supplement: 41467_2019_8343_MOESM3_ESM.pdf [file 41467_2019_8343_MOESM3_ESM.pdf]

File name:

Supplementary Data 1

Description:

Cartesian coordinates of the calculated molecules at the B3LYP-D3BJ/6-31G(d) level.
